# Supplementary material for: Synthesis and characterization of a lactose-based biosurfactant by a novel nanodendritic catalyst and evaluating its efficacy as an emulsifier in a food emulsion system
Source: PubMed Central journal article supplement — RSC Adv. 2022 Nov 10;12(50):32280–96. doi: 10.1039/d2ra06958j (PMC9647696; doi:10.1039/d2ra06958j), 2022-11-10
Supplement: RA-012-D2RA06958J-s001.pdf [file RA-012-D2RA06958J-s001.pdf]

## Supplementary Data

### **Synthesis and Characterization of a Lactose-Based Biosurfactant by a Novel Nanodendritic Catalyst and Evaluating its Efficacy as Emulsifier in a Food Emulsion System**

Maryam Karami<sup>a,c</sup>, Ali Reza Faraji<sup>b,c</sup> \*, Solmaz Saremnezhad<sup>a,c</sup> and Mostafa Soltani<sup>a,c</sup>

<sup>a</sup>Department of Food Science and Technology, Faculty of Pharmacy, Tehran Medical Sciences, Islamic Azad University, Tehran, Iran

<sup>b</sup>Department of Organic Chemistry, Faculty of Pharmaceutical Chemistry, Tehran Medical Sciences, Islamic Azad University, Tehran, Iran

<sup>c</sup>Nutrition and Food Sciences Research Center, Tehran Medical Sciences, Islamic Azad University, Tehran, Iran

\*Corresponding author email address: alireza\_ch57@yahoo.com, a.faraji@iaups.ac.ir

# Tables

**Table 1S.** Chemical composition and physicochemical properties of the multi-functional nano-dendritic catalyst.

| Samples                                                 | Elemental Analysis (wt%) <sup>a</sup> |      | OFG <sup>b</sup> |                 | LR (%) <sup>d</sup> | Structural Parameters <sup>e</sup> |                                |          |
|---------------------------------------------------------|---------------------------------------|------|------------------|-----------------|---------------------|------------------------------------|--------------------------------|----------|
|                                                         | C                                     | N    | CHN              | BT <sup>c</sup> |                     | $S_{BET}$ (m <sup>2</sup> /g)      | $V_{BJH}$ (cm <sup>3</sup> /g) | MPD (mm) |
| MBNP <sub>5</sub>                                       | -                                     | -    | -                | -               | -                   | 71.0                               | 0.17                           | 8.53     |
| L <sub>2</sub> @MBNP                                    | 8.14                                  | 5.20 | 3.69             | 3.64            | -                   | 55.2                               | 0.11                           | 14.2     |
| G <sub>0.5</sub> L <sub>2</sub> @MBNP                   | 10.7                                  | 3.90 | 2.75             | 2.80            | -                   | 37.4                               | 0.90                           | 15.7     |
| G <sub>1.0</sub> L <sub>2</sub> @MBNP                   | 9.25                                  | 7.21 | 4.37             | 4.02            | -                   | 28.4                               | 0.85                           | 20.2     |
| G <sub>1.5</sub> L <sub>2</sub> @MBNP                   | 7.85                                  | 8.03 | 6.32             | 5.85            | -                   | 22.8                               | 0.79                           | 23.1     |
| Met-G <sub>2.0</sub> L <sub>2</sub> @MBNP               | 6.10                                  | 9.23 | 6.58             | 6.25            | -                   | 18.4                               | 0.72                           | 26.5     |
| Mn <sup>II</sup> -G <sub>2.0</sub> L <sub>2</sub> @MBNP | 5.34                                  | 6.35 | -                | -               | 54                  | 16.5                               | 0.64                           | 27.4     |
| Co <sup>II</sup> -G <sub>2.0</sub> L <sub>2</sub> @MBNP | 5.09                                  | 6.12 | -                | -               | 57                  | 16.3                               | 0.63                           | 27.6     |

<sup>a</sup>Carbon and Nitrogen was estimated from the elemental analyses.

<sup>b</sup>Organic functional group determined from the N-contents.

<sup>c</sup> Back titration.

<sup>d</sup> Loading rate of metal ions.

<sup>e</sup> Pore size calculated using BJH method.

**Table 2S.** Reaction condition applied for synthesis of biosurfactant.

| Entry | Catalyst <sup>a</sup>                    | Lac  | Lac:LauA | Solvent | T(°C) | Conversion <sup>b</sup><br>(%) | Yield<br>(%) |
|-------|------------------------------------------|------|----------|---------|-------|--------------------------------|--------------|
| 1     | -                                        | PLac | 1:2      | ACN     | 50    | trace                          | trace        |
| 1     | Co-G <sub>2.0</sub> L <sub>2</sub> @SCMB | PLac | 1:1      | ACN     | 50    | 29.5                           | 21           |
| 2     | Co-G <sub>2.0</sub> L <sub>2</sub> @SCMB | PLac | 1:1      | ACN     | 60    | 48.3                           | 38           |
| 3     | Co-G <sub>2.0</sub> L <sub>2</sub> @SCMB | PLac | 1:2      | ACN     | 40    | 66.7                           | 55           |
| 4     | Co-G <sub>2.0</sub> L <sub>2</sub> @SCMB | PLac | 1:2      | ACN     | 50    | 92.5                           | 87           |
| 5     | Co-G <sub>2.0</sub> L <sub>2</sub> @SCMB | PLac | 1:2      | ACN     | 55    | 93                             | 87           |
| 6     | Co-G <sub>2.0</sub> L <sub>2</sub> @SCMB | PLac | 1:1      | ASTN    | 50    | 41.9                           | 38           |
| 7     | Co-G <sub>2.0</sub> L <sub>2</sub> @SCMB | PLac | 1:2      | ASTN    | 50    | 84.1                           | 74           |
| 8     | Co-G <sub>2.0</sub> L <sub>2</sub> @SCMB | RLac | 1:2      | ACN     | 50    | 32.14                          | -            |
| 9     | Co-G <sub>2.0</sub> L <sub>2</sub> @SCMB | RLac | 1:2      | ACN     | 55    | 39.3                           | -            |
| 10    | Co-G <sub>2.0</sub> L <sub>2</sub> @SCMB | RLac | 1:2      | ASTN    | 50    | 17.3                           | -            |
| 11    | Mn-G <sub>2.0</sub> L <sub>2</sub> @SCMB | PLac | 1:1      | ACN     | 50    | 43                             | 31           |
| 12    | Mn-G <sub>2.0</sub> L <sub>2</sub> @SCMB | PLac | 1:2      | ACN     | 50    | 89.4                           | 83           |
| 13    | Mn-G <sub>2.0</sub> L <sub>2</sub> @SCMB | PLac | 1:1      | ASTN    | 50    | 37.3                           | 33           |
| 14    | Mn-G <sub>2.0</sub> L <sub>2</sub> @SCMB | PLac | 1:2      | ASTN    | 50    | 82.3                           | 72           |
| 15    | Mn-G <sub>2.0</sub> L <sub>2</sub> @SCMB | PLac | 1:2      | ACN     | 55    | 89.4                           | 83           |
| 16    | Mn-G <sub>2.0</sub> L <sub>2</sub> @SCMB | RLac | 1:1      | ACN     | 60    | 47.6                           | 36           |
| 17    | Mn-G <sub>2.0</sub> L <sub>2</sub> @SCMB | RLac | 1:2      | ACN     | 50    | 29.3                           | -            |
| 18    | Mn-G <sub>2.0</sub> L <sub>2</sub> @SCMB | RLac | 1:2      | ACN     | 60    | 35.2                           | -            |
| 19    | Mn-G <sub>2.0</sub> L <sub>2</sub> @SCMB | RLac | 1:1      | ASTN    | 50    | 13.2                           | -            |

<sup>a</sup> Reaction condition: [Co<sup>II</sup>-Cat] =30.0 mg, [Solvent] =6 mL, [MS] =600 mg, *t*=6 h, T=50 °C; [Mn<sup>II</sup>-Cat] =40.0 mg, [Solvent] =6 mL, [MS] =600 mg, *t*=8 day, T=50 °C; <sup>b</sup> Conversion measured by Conv., %= (ΣS, % LauA)/ (Σ S, %Substrate+Σ%S, % Biosurfactant) ×100 %.

# Figures

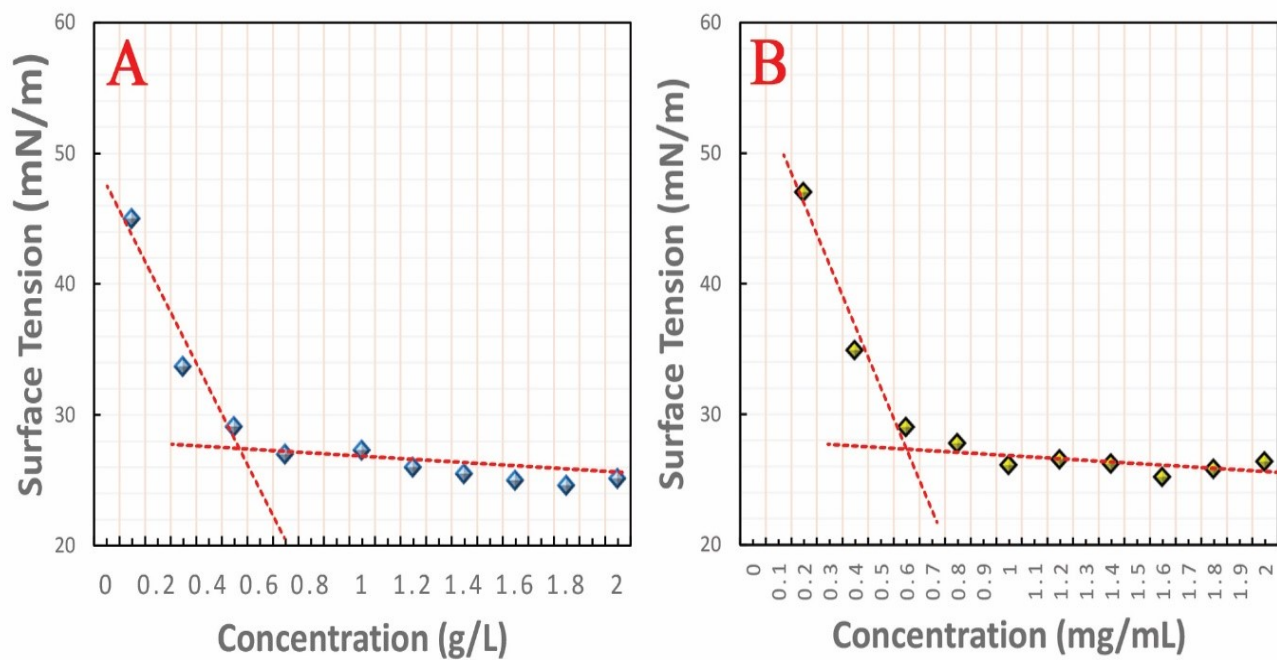

**Fig. 1S.** Surface tension versus concentration plot of biosurfactant by (A) Co<sup>II</sup>-G<sub>2.0</sub>L<sub>2</sub>@SCMB; (B) Mn<sup>II</sup>-G<sub>2.0</sub>L<sub>2</sub>@SCMB.

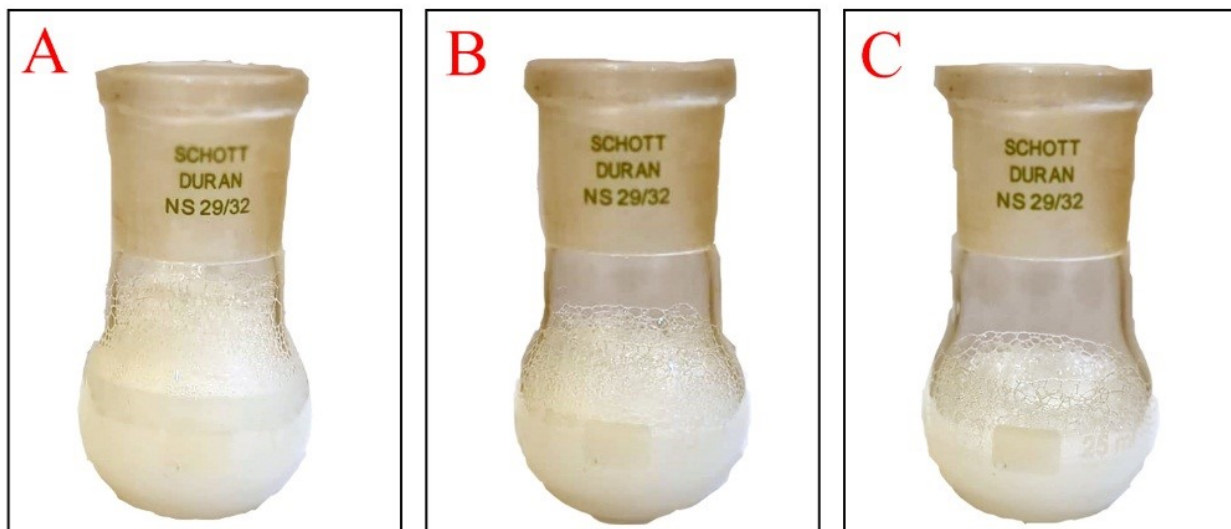

**Fig.2S.** Construction of foam in the presence of LML (aq) with concentration (g/L) (A) 0.6, (B) 0.4 & (C) 0.2.

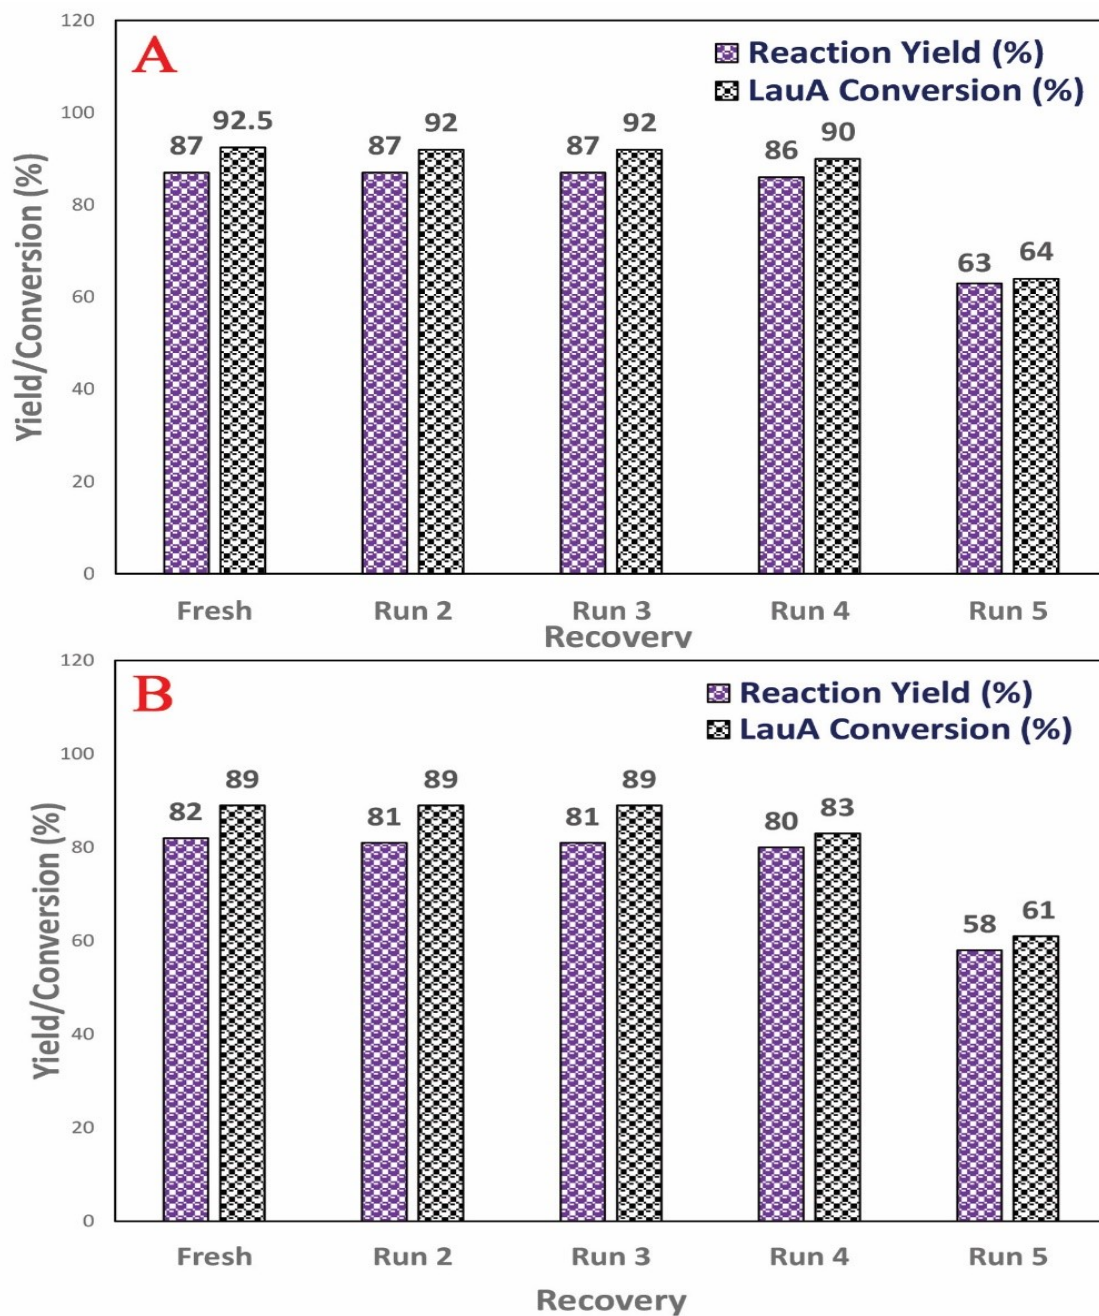

**Fig.3S** (A) Reusability of  $\text{Co}^{\text{II}}\text{-G}_{2.0}\text{L}_2\text{@SCMB}$  in synthesis of biosurfactant; (B) Reusability of  $\text{Mn}^{\text{II}}\text{-G}_{2.0}\text{L}_2\text{@SCMB}$  in synthesis of biosurfactant.
